# Supplementary material
Source: PubMed Central journal article supplement (PMC2683414)
Supplement: NIHMS50600-supplement-01.pdf [file NIHMS50600-supplement-01.pdf]

## Supplemental Data

### ER71 Acts Downstream of BMP, Notch, and Wnt Signaling in Blood and Vessel Progenitor Specification

Dongjun Lee, Changwon Park, Ho Lee, Jesse J. Lugus, Seok Hyung Kim, Elizabeth Arentson, Yun Shin Chung, Gustavo Gomez, Michael Kyba, Shuo Lin, Ralf Janknecht, Dae-Sik Lim, and Kyunghye Choi

**Figure S1.** (A) Sequence of the promoter of *Flk1* used for the luciferase assay. Nine boxes indicate potential Ets binding sites (4 red in sense and 5 blue in anti-sense). T in green box indicates transcriptional start site (based on the numbering by Ronicke et al., 1996). (B) ER71 can activate *Flk1* gene in a dosage dependent manner. RNA from MS1 endothelial cells transfected with control or ER71 were analysed by RT-PCR with the indicated oligos. Numbers indicate the relative ratio of band intensity. *Er71*: forward-5'-GGGGGATTCCAGGACTGCAGCATCCCTTTCG-3', reverse-5'-GGGGAATTCGAAGCGGTATGTGTACTIONTGGCG-3', *Vegfr2 (Flk1)*: forward-5'-TACACAATTCAGAGCGATGTGTGGT-3', reverse-5'-CTGGTTCCTCCAATGGGATATCTTC-3' (Hamada et al., 2005),  *$\beta$ -actin*: forward-5'-ATGAAG ATCCTGACCGAGCG-3', reverse-5'-TACTTGCGCTCAGGAGGAGC-3' (Kubo et al., 2004).

**Figure S2.** (A) H & E staining of transverse section of E9.0 and E9.5. Mutant embryos show lack of endocardium and disorganized myocardium. The boxed area is shown at higher magnification. DA, dorsal aorta; He, heart; NT, neural tube. Scale bar; 50  $\mu$ m (B) H & E staining of sagittal section of E9.0. SM; somites. Scale bars; 50  $\mu$ m. (C) Whole-

mount staining with anti-SM actin of E9.5 embryos. V; ventricle, A; Atrium. Scale bars; 200  $\mu\text{m}$ . (D) Thickness of labyrinth layer. (E) Tunel assay of sagittal sections of E9.5. Fb; Fore-brain, Mb; Mid-brain. Scale bars; 200  $\mu\text{m}$

**Figure S3.** (A) Microarray analysis of *Er71*<sup>-/-</sup> embryos at E8.5 and E9.5. Aliquots of 1  $\mu\text{g}$  of total RNA extracted from whole embryos were used as a template for reverse transcriptase with oligo-dT primers (Intron). All the microarray experiments were done with 20K mouse cDNA chips from Digital Genomics (Seoul, South Korea). Genes showing significant expression changes (at least 1.5 fold) were selected. Data represent increase (red; b) or decreased (green; a) gene expression that was changed at least 1.5-fold in *Er71*<sup>-/-</sup> embryos. 1, E8.5 *Er71*<sup>+/+</sup> vs. *Er71*<sup>+/-</sup>; 2, E8.5 *Er71*<sup>+/-</sup> vs. *Er71*<sup>-/-</sup>; 3, E8.5 *Er71*<sup>+/+</sup> vs. *Er71*<sup>-/-</sup>; 4, E9.5 *Er71*<sup>+/+</sup> vs. *Er71*<sup>-/-</sup>. (B) Gene expression of *Er71*<sup>+/+</sup> and *Er71*<sup>-/-</sup> embryonic hearts at E9.0 (Abu-Issa and Kirby, 2007). Genes were normalized against *Gapdh* and then the ratio of the gene quantity (WT) to gene quantity (MT) was determined to yield normalized fold change.

## Supplementary References

Abu-Issa, R. and Kirby, M. L. (2007). Heart field: from mesoderm to heart tube. *Annu. Rev. Cell. Dev. Biol.* **23**, 45-68.

Chase, L. G., Ulloa-Montoya, F., Kidder, B. L. and Verfaillie, C. M. (2007). Islet-derived fibroblast-like cells are not derived via epithelial-mesenchymal transition from Pdx-1 or insulin-positive cells. *Diabetes* **56**, 3-7.

Hamada, K., Sasaki, T., Koni, P. A., Natsui, M., Kishimoto, H., Sasaki, J., Yajima, N., Horie, Y., Hasegawa, G., Naito, M., *et al.* (2005). The PTEN/PI3K pathway governs normal vascular development and tumor angiogenesis. *Genes Dev.* **19**, 2054-2065.

Kubo, A., Shinozaki, K., Shannon, J. M., Kouskoff, V., Kennedy, M., Woo, S., Fehling, H. J. and Keller, G. (2004). Development of definitive endoderm from embryonic stem cells in culture. *Development* **131**, 1651-1662.

Ronicke, V., Risau, W. and Breier, G. (1996). Characterization of the endothelium-specific murine vascular endothelial growth factor receptor-2 (Flk-1) promoter. *Circ. Res.* **79**, 277-285.

Wang, X. and Seed, B. (2003). A PCR primer bank for quantitative gene expression analysis. *Nucleic Acids Research* **31**, e154;1-8.

**A**

-492 ACGGGGCGGG **GGAT** GCGGTGGCCAAAGCACCATAAAACAAAAC **TTCC** AAG  
TACTGACCAACTCACTGCAAGTTTGTGCCCCGAGTACATCTAGGTTTCAGGG  
GTTCTTGTCTTCATGCTCCCAACTGCGGGG **GGAT** TTTTGGTCCCTTGGGACT  
TTCAGTGCAGCGGCGAAGAGAGTTCTGCACCTGCAGGCTCCTAATGAGGGC  
GCAGTGGGCCTCGTGTTTCTGGTGATG **TTCC** CAGGTTGCTGGGGGCAGCA  
AGTGTCTCAGAGCCCATTACTGGCTACATTTTAC **TTCC** ACCAGAAACCGAGC  
TGC GTCCAGATTTGCTCTCAGATGCGACTTGCCGCCCGGCACAG **TTCC** GGG  
GTAGTGGGGGAGTGGGCGTG **GGAA** ACCG **GGAA** ACCCAAACCTGGT **ATCCA**  
GTGGGGGGCGTGGCCGGACGCAGGGAGTCCCCACCCCTCCCGGTAATGAC  
CCCGCCCCATTGCTAGTGTGTAGCCGGCGCT **CT** CTTTCTGCCCTGAGTC  
CTCAGGACCCCAAGAGAGTAAG +39

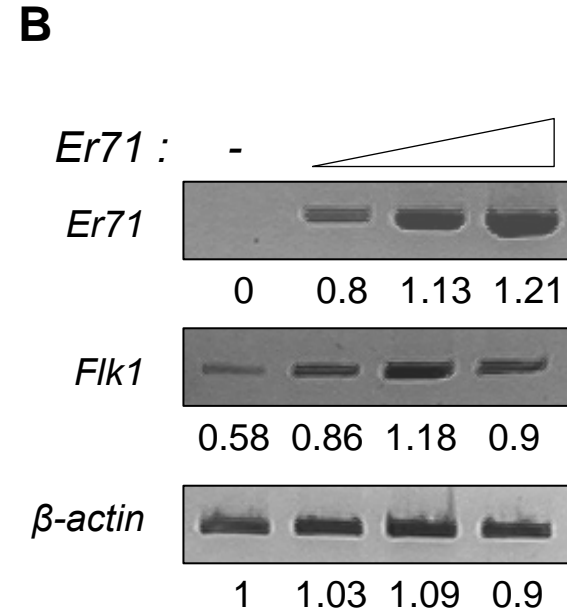

Supplementary Figure 1

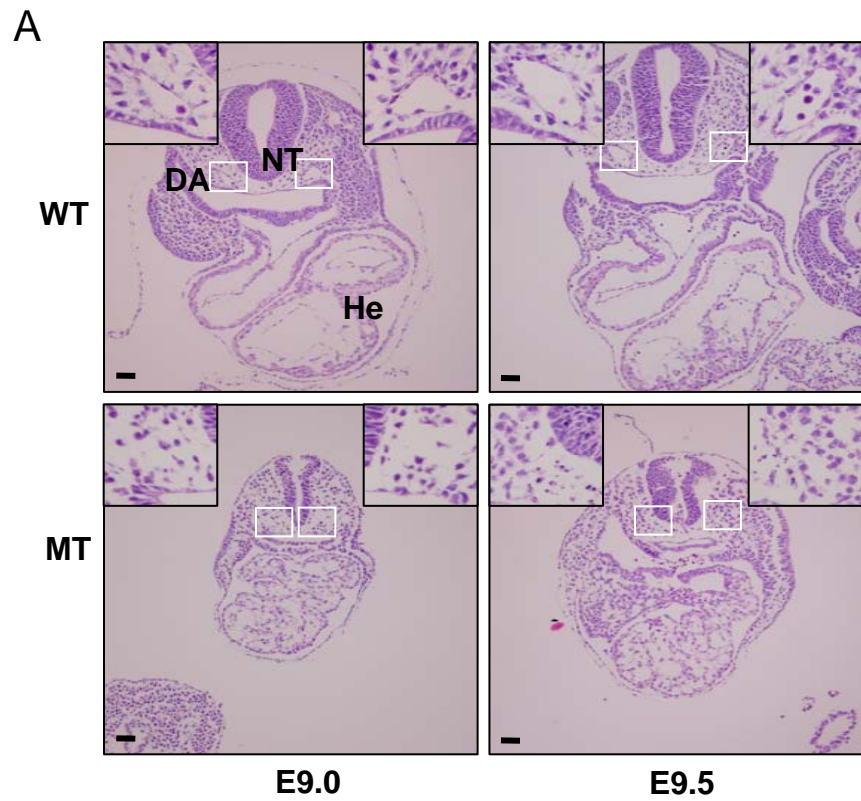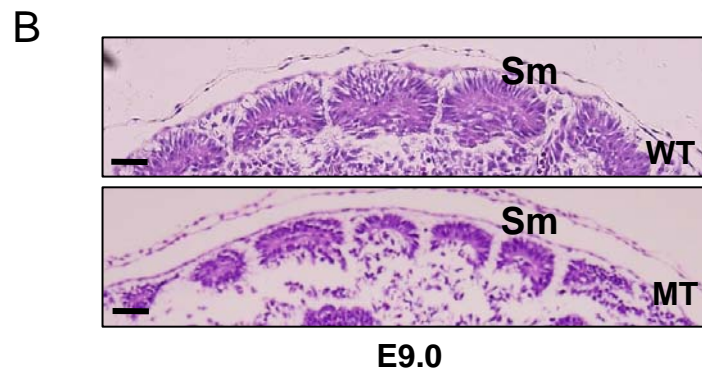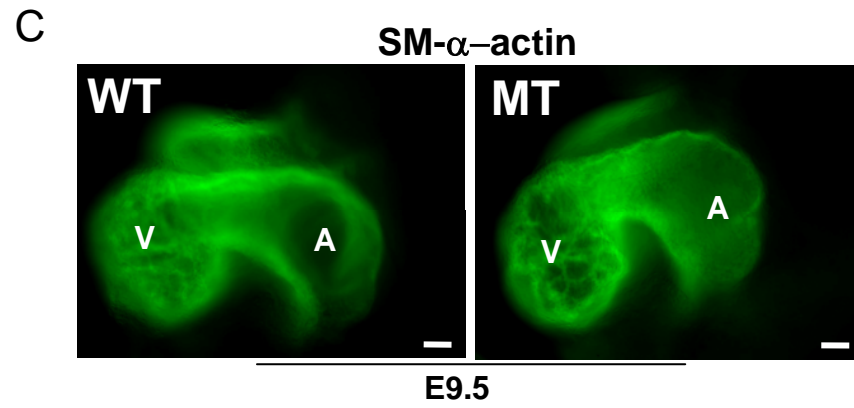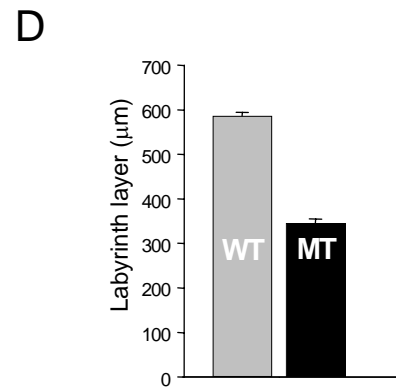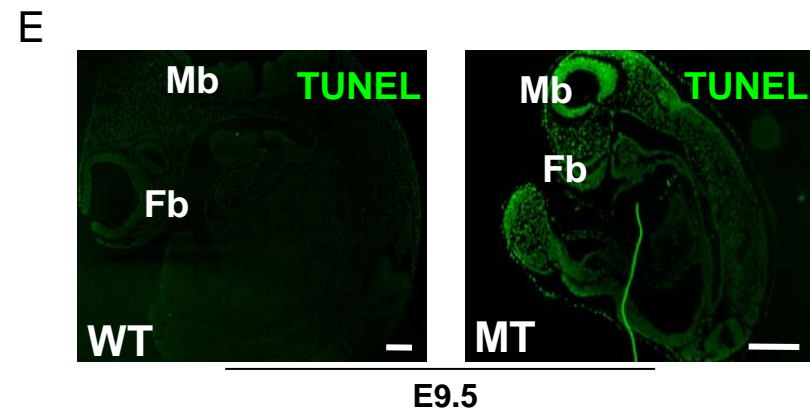

Supplementary Figure 2

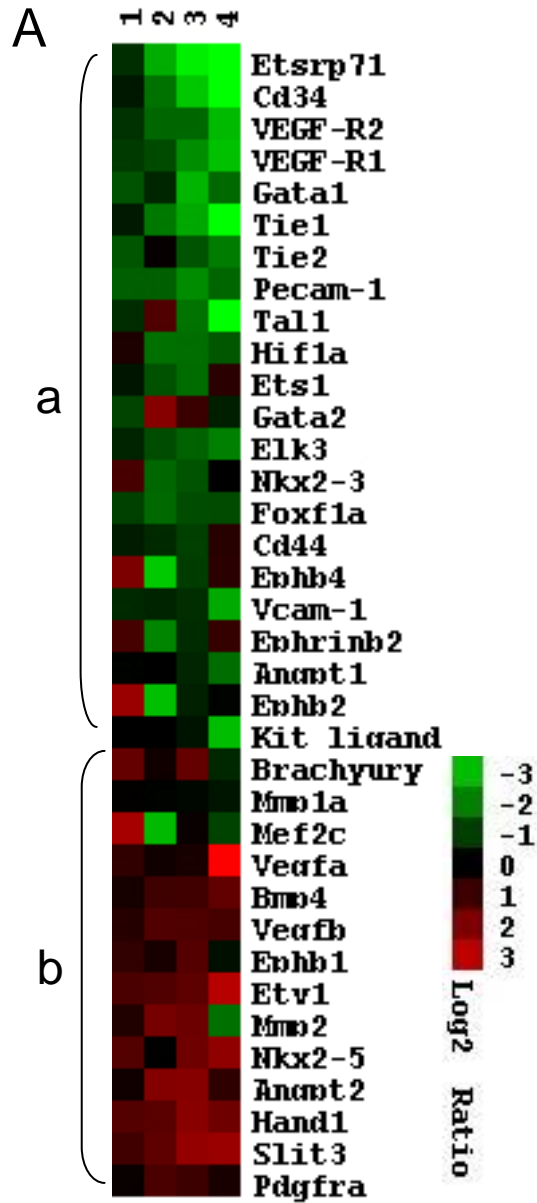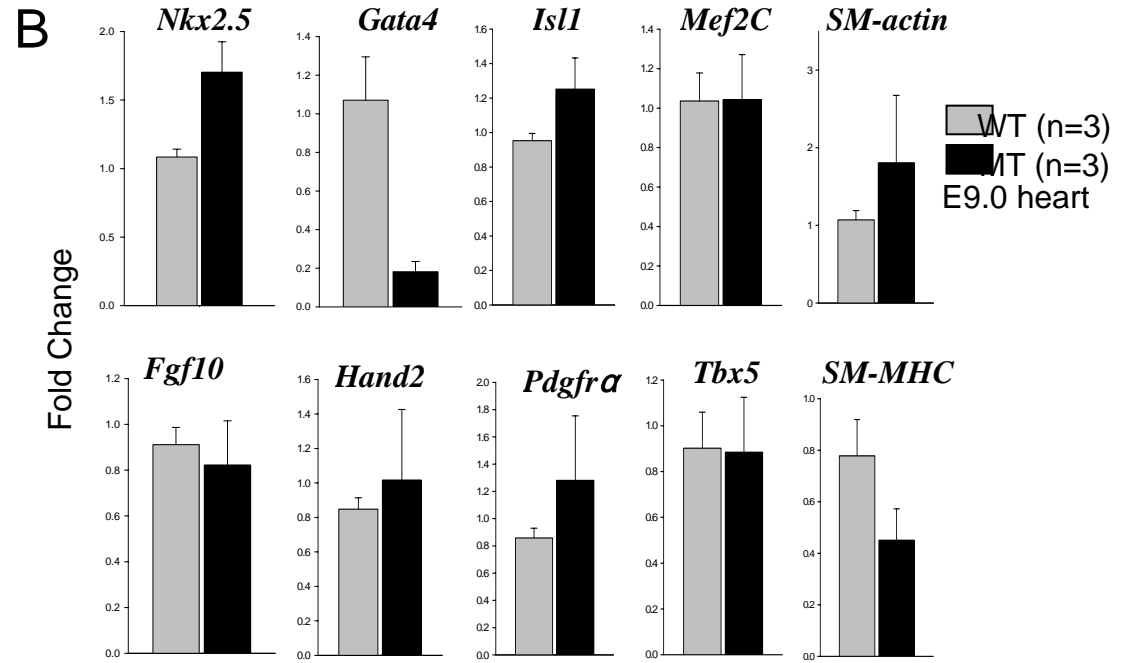

Supplementary Figure 3

**Table S1. Genotypes of progeny from ER71 heterozygous intercrosses**

| Age (dpc)  | No.(%) of mice with indicated genotype |           |          | No.(%) of resorptions | Total |
|------------|----------------------------------------|-----------|----------|-----------------------|-------|
|            | +/+                                    | +/-       | -/-      |                       |       |
| E8.5       | 10(23.3)                               | 20(46.5)  | 12(27.9) | 1(2.3)                | 43    |
| E9.0       | 20(19.4)                               | 59(57.3)  | 24(23.3) |                       | 103   |
| E9.5       | 103(34.3)                              | 129(43)   | 55(18.3) | 13(4.3)               | 300   |
| E11.0-11.5 | 8(53.3)                                | 7(46.7)   | 0(0)     |                       | 15    |
| P21        | 145(34.8)                              | 272(65.2) | 0        |                       | 417   |
| Total      | 286(32.6)                              | 487(55.4) | 91(10.4) | 14(1.6)               | 878   |

**Table S2. Primer sequences for qRT-PCR**

| Genes            |         | Sequences (5'-3')       | References                               |
|------------------|---------|-------------------------|------------------------------------------|
| <i>Fgf10</i>     | Forward | TTTGGTGTCTTCGTTCCCTGT   | Primer Bank <sup>‡</sup><br>ID 7106313a1 |
|                  | Reverse | TAGCTCCGCACATGCCTTC     |                                          |
| <i>Isl1</i>      | Forward | ATGATGGTGGTTTACAGGCTAAC | Primer Bank<br>ID 31543007a1             |
|                  | Reverse | TCGATGCTACTTCACTGCCAG   |                                          |
| <i>Mef2C</i>     | Forward | ATGCCATCAGTGAATCAAAGGAT | Primer Bank<br>ID 13384624a1             |
|                  | Reverse | GTGGTACGGTCTCCCAACT     |                                          |
| <i>Tbx5</i>      | Forward | ATGGCCGATACAGATGAGGG    | Primer Bank<br>ID 34098933a1             |
|                  | Reverse | TTCGTGGAACCTCAGCCACAG   |                                          |
| <i>Brachyury</i> | Forward | CTCCCCTGCACATTACACAC    |                                          |
|                  | Reverse | GAGGCTATGAGGAGGCTTTG    |                                          |
| <i>Cerberus1</i> | Forward | ATCACCTCTACAGGAGGAAGC   | Primer Bank<br>ID 6753410a3              |
|                  | Reverse | GGTCTCCCAGTGTACTTTCGTG  |                                          |
| <i>Er71</i>      | Forward | CAGAGTCCAGCATTCAACCAC   |                                          |
|                  | Reverse | AGGAATTGCCACAGCTGAAT    |                                          |
| <i>Fgf8</i>      | Forward | CCGAGGAGGGATCTAAGGAAC   | Primer Bank<br>ID 22094093a1             |
|                  | Reverse | CTTCCAAAAGTATCGGTCTCCAC |                                          |
| <i>Foxa2</i>     | Forward | ACATACCGACGCAGCTACAC    |                                          |
|                  | Reverse | CCGGTAGAAAGGGAAGAGGT    |                                          |
| <i>α-FP</i>      | Forward | AACTCTGGCGATGGGTGTTTA   | Chase et al., 2007                       |
|                  | Reverse | ACACTGATGTCTTTCCACTCCA  |                                          |
| <i>Goosecoid</i> | Forward | CAGATGCTGCCCTACATGAAC   | Primer Bank<br>ID 6754076a1              |
|                  | Reverse | TCTGGGTACTTCGTCTCCTGG   |                                          |
| <i>Mesp1</i>     | Forward | GTCACTCGGTCTGTTTAAG     | Primer Bank<br>ID 33469091a1             |
|                  | Reverse | ACGATGGGTCCCACGATTCT    |                                          |
| <i>Mesp2</i>     | Forward | CGGCGTTCTCTACCGATG      | Primer Bank<br>ID 6678864a1              |
|                  | Reverse | CACCCCACTACTCATGGCTG    |                                          |
| <i>Pax6</i>      | Forward | GCAGATGCAAAGTCCAGGTG    | Primer Bank<br>ID 18138024a3             |
|                  | Reverse | CAGGTTGCGAAGAAGTCTGTTT  |                                          |
| <i>Sox17</i>     | Forward | GATGCGGGATACGCCAGTG     | Primer Bank<br>ID 6755604a1              |
|                  | Reverse | CCACCACCTCGCCTTTTAC     |                                          |
| <i>Tbx6</i>      | Forward | ATGTACCATCCACGAGAGTTGT  | Primer Bank<br>ID 6755722a1              |
|                  | Reverse | GGTAGCGGTAACCCTCTGTC    |                                          |

<sup>‡</sup> Wang and Seed, 2003.



**Table S3. Primer sequences for ChIP  
and Luciferase Assay Construct**

| ChIP Primers         |         | Sequences (5'-3')              | References           |
|----------------------|---------|--------------------------------|----------------------|
| -501~-323            | Forward | AAACATTCAGACGGGGCG             | Ronicke et al., 1996 |
|                      | Reverse | TTCGCCGCTGCACTGAAAGTCC         |                      |
| -321~-155            | Forward | AGAGTTCTGCACTTGCAGGC           | Ronicke et al., 1996 |
|                      | Reverse | CAAGTCGCATCTGAGAGCAAAT         |                      |
| -174~-81             | Forward | TTGCTCTCAGATGCGACTTG           | Ronicke et al., 1996 |
|                      | Reverse | CCACTGGATACCAGGTTTGG           |                      |
| +20~+239             | Forward | CAGGACCCCAAGAGAGTAAG           | Ronicke et al., 1996 |
|                      | Reverse | GCCCGCAAAGAAGTCACAG            |                      |
| -50.4kb              | Forward | GAGGGGAAATTGAGCAGGTA           | Ronicke et al., 1996 |
|                      | Reverse | GTGTGACAGTTCCCCTGCTT           |                      |
| <i>Flk1</i> promoter |         | Sequences (5'-3')              |                      |
| -492~+39             | Forward | AATTCTCGAGGACGGGGCGGGGGATGCGGT | Ronicke et al., 1996 |
|                      | Reverse | AATTAAGCTTCTTACTCTTTGGGGTCCTG  |                      |
